# Supplementary material
Source: publisher site journal article supplement (https://www.dovepress.com/article/254612)
Supplement: Supplementary file 1 [file get_supplementary_file.php]

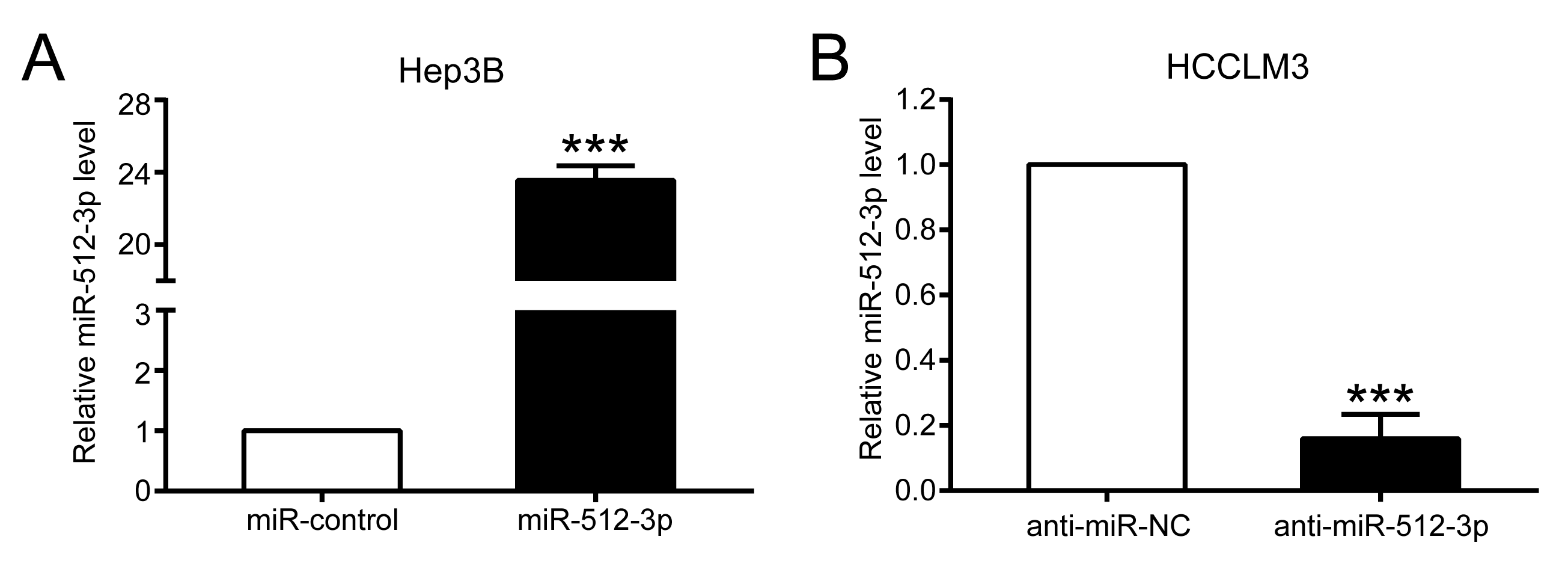


**Supplementary Figure 1:** The transfection efficiencies of miR-512-3p mimics and inhibitors in Hep3B (A) and HCCLM3 (B) cells were determined via qRT-PCR. ****p* **<** 0.001, Student’s *t*-test, *n* **=** 3.


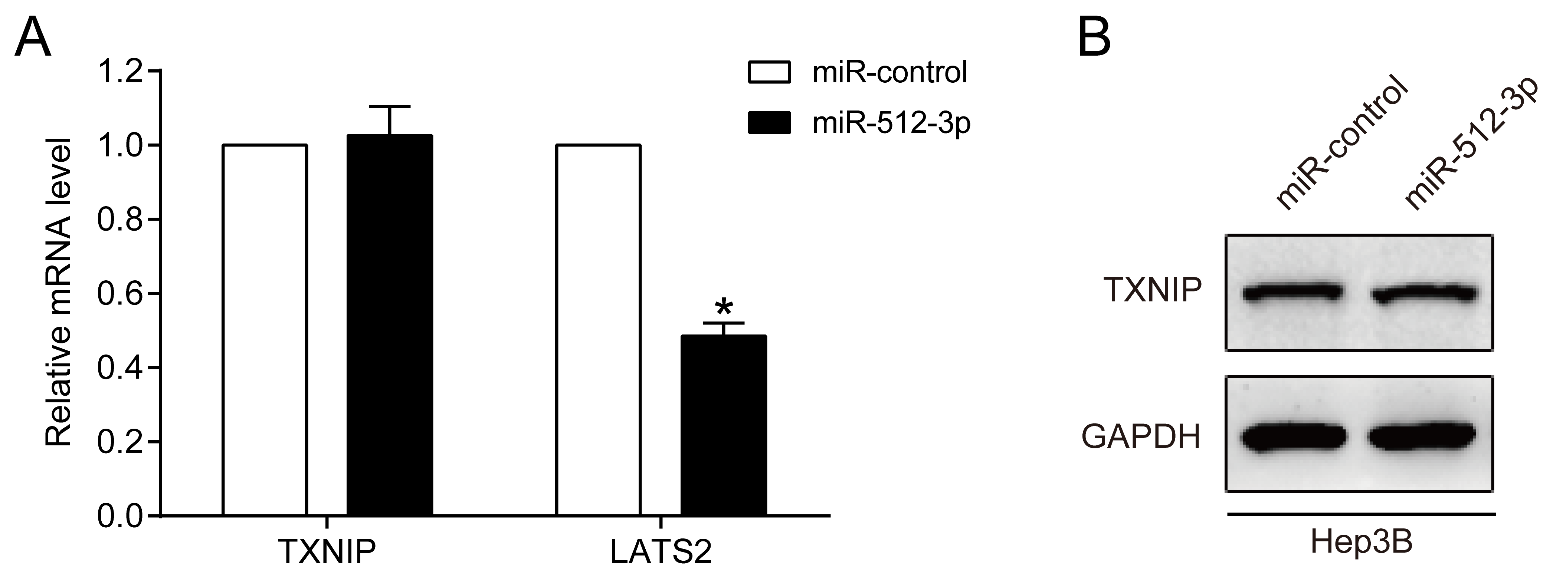


**Supplementary Figure 2:** qRT-PCR and western blot analyses indicated that thioredoxin interacting protein was not significantly regulated by miR-512-3p at the mRNA level or the protein level. **p* < 0.05, Student’s *t*‑test, *n* = 3.
